# Supplementary material for: A laser-induced graphene/PDMS composite sensor with a dual structure enabling high-sensitivity under micro-strain and extended-range sensing
Source: Royal Society of Chemistry journal article supplement (doi:10.1039/d5ta04469c), 2025-01-01
Supplement: d5ta04469c1.pdf [file d5ta04469c1.pdf]

**Laser-induced graphene/PDMS composite with a dual  
structure enabling high-sensitivity under micro-strain and  
extended-range sensing**

*Guangmeng Chen, Ming Mu, Wenjie Yu, Li Jia, Ziqiang Hu, Weiwei Zhao,\* Xiaoqing  
Liu\**

State Key Laboratory of Advanced Marine Materials, Ningbo Institute of Materials  
Technology and Engineering, Chinese Academy of Sciences, Ningbo, Zhejiang  
315201, China

Corresponding authors:

Weiwei Zhao, E-mail address: [zhaoweiwei@nimte.ac.cn](mailto:zhaoweiwei@nimte.ac.cn)

Xiaoqing Liu, E-mail address: [liuxq@nimte.ac.cn](mailto:liuxq@nimte.ac.cn)

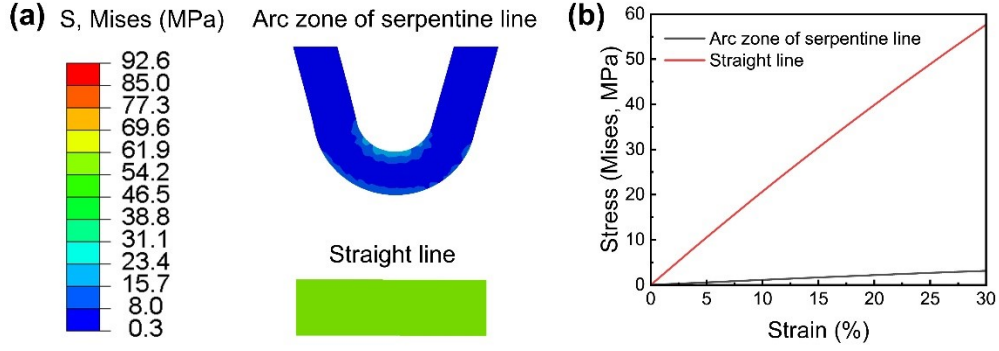

**Figure S1.** (a) Enlarged view of the finite element simulation results for parallel-connected sensor at the strain of 30%. (b) The Mises stress-strain curves of arc zone at neutral plane for serpentine line and straight line. Upon stretched, the arc zone for serpentine line undergoes bending deformation. The LIG bears a low bending stress near the neutral plane, which ensures the integrity of the conductive structure. For straight line, it undergoes tensile deformation, which results in the rapid increase of tensile stress, causing easy formation of microcracks.

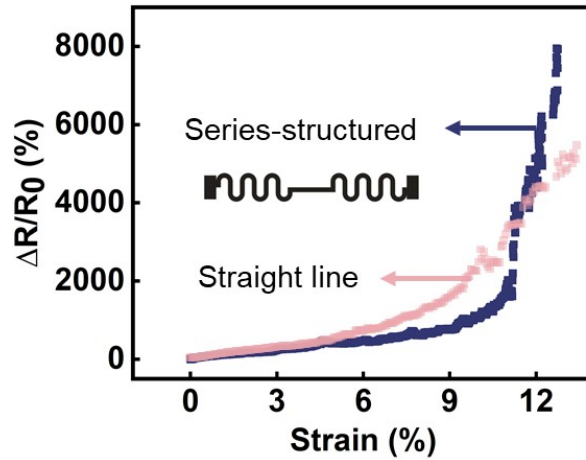

**Figure S2.** Relationship between the relative resistance changes and strains for the sensor with straight line and the sensor with the series-structure of straight line and serpentine lines

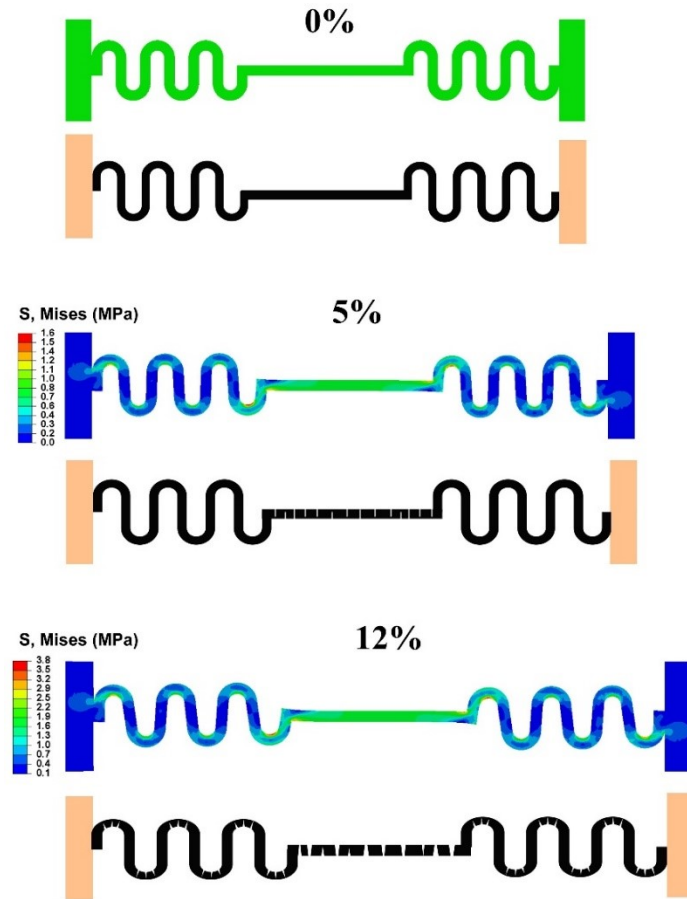

**Figure S3.** Finite element simulation showing the stress distribution of series-connected sensor at the strain of 0%, 5% and 12%.

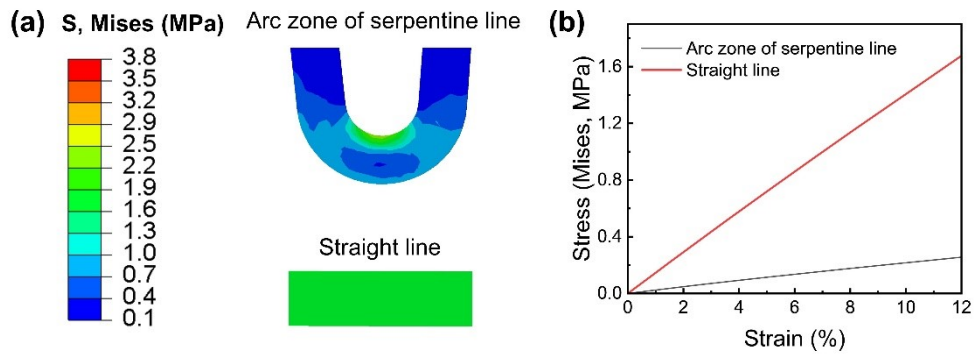

**Figure S4.** (a) Enlarged view of the finite element simulation results for series-connected sensor at the strain of 12%. (b) The Mises stress-strain curves of arc zone at neutral plane for serpentine line and straight line.

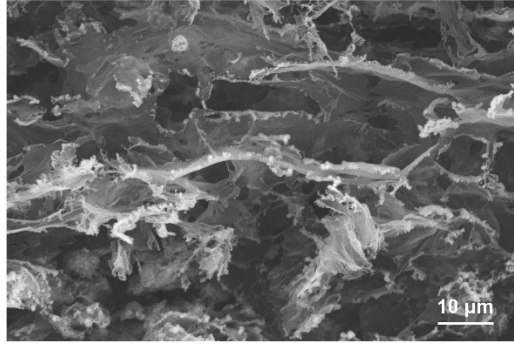

**Figure S5.** The SEM image showing the pore structure of LIG.

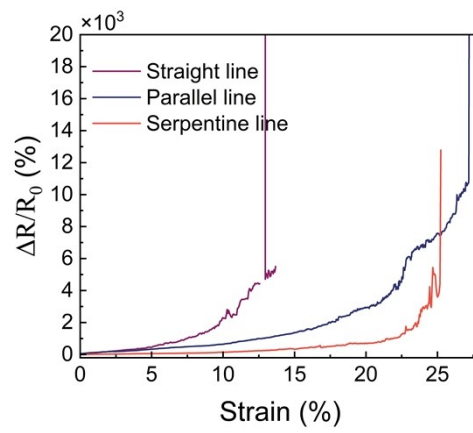

**Figure S6.** Relationship between relative resistance changes and strains until breakage for straight, serpentine, and parallel lines

**Table S1.** Comparison of the sensitivity and work range for reported stretchable strain sensors with different conductive fillers and matrices.

| Conductive filler | Matrix           | Sensitivity | Work range   | Ref. |
|-------------------|------------------|-------------|--------------|------|
| Pt                | PUA              | 16000       | <2%          | 1    |
| Graphene          | PDMS             | 1037        | <2%          | 2    |
| Carbon black      | Rubber           | 28.4        | <20%         | 3    |
| CNT               | PDMS             | 26.7        | <150%        | 4    |
| Ni/Graphene       | PU sponge        | 36.03       | <20%         | 5    |
|                   |                  | 3360.09     | 20%~65%      |      |
| Graphene belts    | Dragon skin      | 175.16      | <34.94%      | 6    |
|                   |                  | 13278       | 34.94~55.55% |      |
| CNTs/AgNWs        | TPU              | 4.1         | <5%          | 7    |
|                   |                  | 1005.8      | 5%~350%      |      |
| MXene             | Polyester Fabric | 9.7         | <1%          | 8    |
|                   |                  | 26.6        | 1%~3%        |      |
|                   |                  | 6.6         | 3%~8%        |      |
| MXene/CNT         | PDMS             | 16          | <40%         | 9    |
|                   |                  | 165         | 40~85%       |      |
|                   |                  | 1939        | 85%~105%     |      |

## References

- [1] B. Park, J. Kim, D. Kang, C. Jeong, K. S. Kim, J. U. Kim, P. J. Yoo, T. I. Kim, *Adv. Mater.* 2016, **28**, 8130-8137.
- [2] X. M. Li, T. T. Yang, Y. Yang, J. Zhu, L. Li, F. E. Alam, X. Li, K. L. Wang, H. Y. Cheng, C. T. Lin, Y. Fang, H. W. Zhu, *Adv. Funct. Mater.* 2016, **26**, 1322-1329.
- [3] W. A. Liao, X. J. Wu, Y. Q. Qiu, T. Li, Y. D. Hu, C. Lu, F. Wang, X. L. Liu, *J. Colloid Interf Sci.* 2025, **683**, 684-693.
- [4] D.-H. Joo, M.-S. Kang, S. J. Park, S. A. Yu, W.-T. Park, *Sens. Actuators, A* 2022, **345**, 113775.
- [5] F. Han, J. H. Li, S. F. Zhao, Y. Zhang, W. P. Huang, G. P. Zhang, R. Sun, C. P. Wong, *J. Mater. Chem. C* 2017, **5**, 10167-10175.
- [6] Y. X. Li, T. Y. He, L. J. Shi, R. R. Wang, J. Sun, *ACS Appl. Mater. Interfaces* 2020, **12**, 17691-17698.
- [7] G. Li, Y. S. Xue, H. Peng, W. F. Qin, B. Zhou, X. Zhao, G. C. Liu, S. Y. Li, R. H. Guo, *Sens. Actuators, A* 2024, **366**, 114998.
- [8] W. Lu, B. Mustafa, Z. Wang, F. Lian, G. Yu, *Nanomaterials (Basel)* 2022, **12**.
- [9] B. Xu, F. Ye, R. Chen, X. Luo, G. Chang, R. Li, *Ceramics International* 2022, **48**, 10220-10226.
